# Supplementary material for: Antibody Fab‐Fc properties outperform titer in predictive models of SIV vaccine‐induced protection
Source: PubMed Central journal article supplement (PMC6497031; doi:10.15252/msb.20188747), 2019-05-02
Supplement: MSB-15-e8747-s002.pdf [file MSB-15-e8747-s002.pdf]

## Antibody Fab-Fc Properties Outperform Titer in Predictive Models of SIV Vaccine-Induced Protection

Srivamshi Pittala, Kenneth Bagley, Jennifer A. Schwartz, Eric P. Brown, Joshua A. Weiner, Ilia J. Prado, Wenlei Zhang, Rong Xu, Ayuko Ota-Setlik, Ranajit Pal, Xiaoying Shen, Charles Beck, Guido Ferrari, George K. Lewis, Celia C. LaBranche, David C. Montefiori, Georgia D. Tomaras, Galit Alter, Mario Roederer, Timothy R. Fouts, Margaret E. Ackerman and Chris Bailey-Kellogg

---

### Review timeline:

|                     |                                |
|---------------------|--------------------------------|
| Submission date:    | 16 <sup>th</sup> December 2018 |
| Editorial Decision: | 4 <sup>th</sup> March 2019     |
| Revision received:  | 1 <sup>st</sup> April 2019     |
| Accepted:           | 4 <sup>th</sup> April 2019     |

---

Editor: Maria Polychronidou

### Transaction Report:

(Note: With the exception of the correction of typographical or spelling errors that could be a source of ambiguity, letters and reports are not edited. The original formatting of letters and referee reports may not be reflected in this compilation.)

---

1st Editorial Decision

4<sup>th</sup> March 2019

---

Thank you again for submitting your work to Molecular Systems Biology. I would like to apologise once again for the delay in sending you a decision on your manuscript. As I already mentioned in my message earlier today, we had initially secured two reviewers but unfortunately reviewer #1 never returned a report despite repeated reminders. In order to perform an informed evaluation without relying on the single opinion of reviewer #2, we had to invite new reviewers and this considerably delayed the process. An additional reviewer (#3) accepted to evaluate the study and returned their report this past weekend. As you will see below, the two reviewers are overall positive. However, they raise a series of concerns, which we would ask you to address in a revision.

Overall, the reviewers' recommendations are clear. Therefore I think that there is no need to repeat any of the comments listed below. Please feel free to contact me in case you would like to discuss in further detail any of the issues raised by the reviewers.

-----

### REFeree REPORTS.

Reviewer #2:

This is an interesting paper where Pittala et al. used a multiplex assay to characterize Fab and Fc function of antibodies elicited by different vaccine regimens described in earlier publications. In the first vaccine study they uses data from an Fc array that included 12 Fab specificity and 10 Fc proprieties and developed a predictive analysis framework to investigate correlate of risk against SIVmac251 infection in vaccinated macaques.

They found that anti envelope abs able to bind the complement cascade initiator C1q was a predictor of a decrease risk of virus acquisition. Analyses that included the titers of antibodies did not do better than the Fc array alone in predicting risk.

Similarly in the second study the Fc array alone scored better than the titers or the combination of both.

Overall the paper demonstrated a contribution of the quality of vaccine-induced antibody response in predicting the risk of virus acquisition. The notion that Systems Serology can be used to monitor immune responses in vaccinees, is very exciting.

What remains unclear and needs to be clarified/addressed for the reader includes :

First Study:

-Was the predictive result of vaccine efficacy obtained with more than one env immunogens ? Did the Fc array on C1q for the rhFLSC immunogen correlate?

- The ADCC titers correlated with the risk of both SHIV and SIV acquisition.

There should be more discussion on why this response was not scored in the predictive analysis framework?

Second study:

This part of the paper is not described in sufficient details and not discussed in the context of the correlates found in the prior work (monocyte mediated phagocytosis and neutrophil mediated phagocytosis)

What Fab specificities correlated in the second study?

Reviewer #3:

In the manuscript by Pittala et al., authors reconsidered the previously published vaccine study in rhesus macaque model of HIV infection [Fouts et al., PNAS 2015]. Fouts et al. have shown that a balance between protective antibody response (ADCC specific for CD4-induced epitopes) and T-cell activation determines the level of protection with low amount of vaccine-generated T cell immunity being critical to high level of protection. The manuscript by Pittala et al. aimed to additionally dissect the humoral response. Protection data from heterologous challenge Study 3 in Fouts et al. were used together with serum data (collected for a single pre-challenge timepoint and analyzed by multiplexed Fc Array) to develop predictive statistical models. Multivariate survival analysis predicted a subject's risk of infection, and regularized logistic regression approach was used to classify adjuvant-specific group differences. The models revealed four antibody correlates of protection with three protective features all pointed to antibodies capable of binding the complement cascade initiator C1q and one increased risk of infection feature involving FcγR2A binding. The models suggested the Fc properties of antibody may be more predictive than the titer, while in some settings the titer still may play a considerable role as has been shown by additional analysis of vaccine study from Ackerman et al. [Nat.Med. 2018].

Major points:

The title of the paper is "Antibody Fab-Fc properties outperform titer in predictive models...", but the "titer" used in the analysis is not clearly defined. The manuscript states -- "Antibody quantity was also assessed at two different serum concentrations by an anti-IgG detection reagent". How do these two measured "titer" features relate to the titer from standard assays like ELISA or neutralization? What do the "high" and "low" features mean? Usually, the titer is defined by the assay and has just one measurement. So, here without explanation it is very confusing.

Authors named the titer feature as "quantitative", but with binary output of "high" and "low" it seems to be still rather qualitative or semi-quantitative.

The overall separation of the Detection Reagents into "qualitative" and "quantitative" is very confusing, because all Fc Array data were obtained, analyzed, and presented in the same manner, and all columns in Figures S1C,D have quantitative content.

The authors based their analysis on Fc Array data collected for a single timepoint. The manuscript says it is "post-vaccination, pre-challenge", but it would be useful if they can specify when after the boost the samples were collected. With 2 weeks between the boost and challenge we may expect better identification of correlates of protection if samples were acquired just before the challenge and not right after the boost. If samples from different animals were taken at different time points within the two week-window, will it be taken into account by the models?

Models based on humoral response alone fail to predict the protection outcome without addition of T cell response in some animals (Figure S5A). It is curious to see a discussion on which of the 4 humoral predictive features and to what extent were involved in these cases.

Very intriguing result of the manuscript is a high role of antibodies able to bind C1q in protection. Could it be indirectly linked to amount of generated T cell response? Did authors try to see the correlations between the three C1q features and IFN $\gamma$  level? C1q has been reported to limit dendritic cell differentiation and activation by engaging LAIR-1 [Son et al. 2012], so we might expect some link.

Fouts et al. study have shown that addition of second adjuvant LTA1 to IL-12 reduced the high protection observed with IL-12 alone. It would be interesting to see a discussion if any of the specific analyzed Fc features or their combination may account for this effect.

Minor points:

The current description of experimental study [Ref.43] in Introduction is confusing due to numbering 1)-3). I suggest to remove 3) and talk about adjuvant in a separate sentence. Also, the Reader will benefit from overall more accurate description of the experiments here. For example, mentioning the route of prime vaccination and that the boost was with rhFLSC variant different from included in the prime vaccination.

suggestion for Table in Figure 1A to have just one unified description and not four same repeats in columns 3 and 4

Fig.S5 description in the text "three of the six poorly protected animals that were predicted to have low risk of infection". suggestion to highlight those 6 animal points in different color to make it easy for Reader to follow.

Fig.S5 A,C have "!" instead of "gamma"

1st Revision - authors' response

1<sup>st</sup> April 2019

## Overall

Before addressing the individual comments, we thought it would be helpful to answer a general form of a concern that we think might underlie questions from both reviewers: "A particular feature was correlated with challenge, so why did it not show up in the predictive models?"

In this work, we focus on identifying correlates of protection that are predictive, in that a model built using these correlates can make predictions regarding animals that were not used in training that model, and that the accuracy and robustness of these predictions can be quantified. We did so by means of a cross-validation framework, in which models are trained using some of the subjects and predictions are made on the held-out remainder, cycling through different held-out subsets of subjects so that predictions are made for all subjects based on models from some of the other subjects. This predictive testing is more stringent than evaluating correlations over all subjects, as correlations may describe trends that are observable in the data, but may be driven by a relatively small group of the subjects and may not be robustly predictive regarding new subjects. Hence, a predictive model may omit features that it considers likely to generalize poorly, perhaps due to weak overall predictive performance. Furthermore, in order to help both generalizability and interpretability, we used a training approach that sought "sparse" models, using only a small set of features. Consequently, when multiple features had similar trends, typically only one would be used and the others omitted.

We thank the reviewers for raising this important question by way of their comments. We have now included some relevant discussion at the start of the "Predictive analysis framework" section (lines 164-175).

**Reviewer #2**

What remains unclear and needs to be clarified/addressed for the reader includes :

First Study:

- Was the predictive result of vaccine efficacy obtained with more than one env immunogens ?
- Did the Fc array on C1q for the rhFLSC immunogen correlate?

Authors' response: We found only one Env immunogen (SIVmac1A11.gp140 in Fig 1E) contributed to the most predictive models. Furthermore, we found in our substitution analysis (Fig 1F) no additional Env immunogen contributed to these models.

We measured C1q against three rhFLSC immunogens, and these were weakly correlated with risk of infection as shown in the table below. These weak correlations did not generalize well to a predictive setting.

|   | Fc Array Feature Name       | Concordance Index (p-value) |
|---|-----------------------------|-----------------------------|
| 1 | C1q.SIVmac239.rhFLSC        | 0.60 (0.11)                 |
| 2 | C1q.3352.rhFLSC             | 0.57 (0.28)                 |
| 3 | C1q.CCG7V.rhFLSC            | 0.52 (0.65)                 |
|   | <b>Fc Array Final Model</b> | <b>0.74 (&lt;0.0001)</b>    |

- The ADCC titers correlated with the risk of both SHIV and SIV acquisition. There should be more discussion on why this response was not scored in the predictive analysis framework?

Authors' response: This paper focused on predictive modeling based on biophysical properties of antibodies, characterizing the extent to which such properties enabled better predictions than magnitude alone. However, since, as the reviewer references, the previous analysis found a correlate of protection involving ADCC titers jointly with the cellular response, we did also study the relationship between antibody-property features and ADCC (Appendix Figure S5C). However, when we included ADCC in our predictive analysis, it was not selected by the models (see preamble discussion re correlation vs. predictive modeling), and it was only weakly correlated with the challenge outcome (Concordance index: 0.49). We note that the previous study of this genetically adjuvanted vaccine ("study 3" in Fouts et al., PNAS, 2015) found ADCC to be associated with reduced infection only when considered jointly with the cellular response, but not on its own, and only in looking at groups that were differentially protected, not in terms of a correlative relationship between these activity and the challenge outcomes observed for individual subjects.

Second study:

This part of the paper is not described in sufficient details and not discussed in the context of the correlates found in the prior work (monocyte mediated phagocytosis and neutrophil mediated phagocytosis)

What Fab specificities correlated in the second study?

Authors' response: We apologize for the insufficient characterization for the second study. We have now added details describing the vaccine regimen, along with functional and Fc array measurements correlated with protection/risk (start of "Quality-based models outperform titer-based models in a distinct SIV vaccine study", lines 358-369). We also note that the motivation to revisit that study in this manuscript was to verify the generality of the observations we made for the first study regarding the importance of antibody properties, and hence only used Fc array data for modeling.

When a survival analysis was performed on the Fc Array data from that study, the prediction model identified a combination of four features listed in the table below. Of the three that correlated with protection, two corresponded to the ability of V1a (variable loop) and G49 (V1b) peptide-specific

antibodies to bind to FcγR2A.4, and one corresponded to the ability of SIV<sub>mac239</sub>gp140-specific antibodies to bind to the complement cascade initiating C1q protein.

These correlates are addressed in detail in the original publication of modeling for this study (Ackerman et al, Nat Med 2018), and we have added a summary to the present manuscript (paragraph referenced above).

|   | Fc Array Feature Name              | Associated with |
|---|------------------------------------|-----------------|
| 1 | Hu.FcγR2A.4.high.V1a               | Protection      |
| 2 | Hu.FcγR2A.4.high.G49               | Protection      |
| 3 | Hu.C1q.SIV <sub>mac239</sub> gp140 | Protection      |
| 4 | Hu.C1q.SIV <sub>smE543</sub> gp140 | Risk            |

### Reviewer #3

Major points:

The title of the paper is "Antibody Fab-Fc properties outperform titer in predictive models...", but the "titer" used in the analysis is not clearly defined. The manuscript states -- "Antibody quantity was also assessed at two different serum concentrations by an anti-IgG detection reagent". How do these two measured "titer" features relate to the titer from standard assays like ELISA or neutralization? What do the "high" and "low" features mean? Usually, the titer is defined by the assay and has just one measurement. So, here without explanation it is very confusing.

Authors named the titer feature as "quantitative", but with binary output of "high" and "low" it seems to be still rather qualitative or semi-quantitative.

Authors' response: We apologize for our lack of clarity regarding the "titer" measurement, and in particular the fact that we have two different features, from different serum concentrations, that are related to titer. A previous study (Brown et al, 2012) showed that anti-IgG detection reagent measurements are correlated with traditional ELISA-based measurements of titer. Hence we refer to Fc array features that use anti-IgG detection reagents as "titer" features. The two features with "high" and "low" sub-labels correspond to these measurements at two different *serum* concentrations. We have clarified our usage of this term and the measurements it describes in both the main text, when it is first introduced ("Antibody profiles" section, lines 142-161), and the Methods & Protocols ("Multiplexed IgG titration and Fc Array", lines 509-510).

The overall separation of the Detection Reagents into "qualitative" and "quantitative" is very confusing, because all Fc Array data were obtained, analyzed, and presented in the same manner, and all columns in Figures S1C,D have quantitative content.

Authors' response: The reviewer is entirely correct that all measurements are quantitative, and we apologize for the confusion regarding our characterization of some as "qualitative". By "qualitative", we mean that a feature has additional properties, or "qualities", beyond just magnitude. So whereas titer is only about magnitude, other Fc Array measurements capture additional characteristics of the antibodies (subclass, Fc receptor binding ability, etc.) that may be indicative of the degree to which a response is beneficial or detrimental. Since a high titer of a "bad" antibody could in fact lead to poor protection, our whole premise is that it is necessary to evaluate these qualities and not just assess titer, and we develop a framework that we show is able to leverage this to make better predictions. We have further edited the text throughout to try to eliminate the source of confusion and clarify the overarching philosophy regarding antibody qualities/properties. (The paragraph referenced above on "Antibody profiles", lines 142-161, has the most concentrated changes.)

The authors based their analysis on Fc Array data collected for a single timepoint. The manuscript says it is "post-vaccination, pre-challenge", but it would be useful if they can specify when after the boost the samples were collected. With 2 weeks between the boost and

challenge we may expect better identification of correlates of protection if samples were acquired just before the challenge and not right after the boost. If samples from different animals were taken at different time points within the two week-window, will it be taken into account by the models?

Authors' response: We thank the reviewer for pointing this out. The serum samples were all collected on the day of the challenge. We have now specified this timepoint in the initial description of the study (line 119). Since all samples were collected at the same time, we did not have to account for any timepoint differences.

Models based on humoral response alone fail to predict the protection outcome without addition of T cell response in some animals (Figure S5A). It is curious to see a discussion on which of the 4 humoral predictive features and to what extent were involved in these cases.

Authors' response: While we sympathize with the reviewer's interest in gaining insights into why this particular model worked better on some particular subjects than on others, we also don't want to read too much into these particulars based on small numbers. The three subjects were not strikingly different in one or more of these 4 features from the well-protected animals, hence the model's prediction of low risk. And of course it is likely that factors other than the humoral response relate to challenge outcomes (else we would expect all control animals to be infected uniformly). Unfortunately, though we consider the role of T cell responses to "explain" the poorer predictions among some animals, this was done based on the prior observation, as we consider the study to not be powered sufficiently well to support further sub-setting or sub-analysis, though it would be interesting to follow up on this suggestion if it were.

Very intriguing result of the manuscript is a high role of antibodies able to bind C1q in protection. Could it be indirectly linked to amount of generated T cell response? Did authors try to see the correlations between the three C1q features and IFN $\gamma$  level? C1q has been reported to limit dendritic cell differentiation and activation by engaging LAIR-1 [Son et al. 2012], so we might expect some link.

Authors' response: The reviewer raises an interesting point. The simplest interpretation of potential mechanistic relevance of the C1q-associated correlate(s) is that antibody-dependent induction of the complement cascade may be involved in protection, for example, via direct viral lysis or the lysis of infected cells with envelope on their surfaces. However, there are many possible alternatives. To evaluate the possibility raised here, we looked for a relationship between these features and IFN $\gamma$ , and observed no or weak correlation as shown in the table below, suggesting no such link to T-cell response.

|   | Fc Array Feature Name | Pearson's correlation coeff. |
|---|-----------------------|------------------------------|
| 1 | C1q.SIVmac1A11.gp140  | -0.15                        |
| 2 | C1q.SIVsmH4.Gag       | 0.03                         |
| 3 | C1q.SIVmac239.Pol     | 0.31                         |

Fouts et al. study have shown that addition of second adjuvant LTA1 to IL-12 reduced the high protection observed with IL-12 alone. It would be interesting to see a discussion if any of the specific analyzed Fc features or their combination may account for this effect.

Authors' response: We agree with the reviewer (and comment to that effect in the discussion) that it would be interesting to see what differences in response were caused due to the addition of LTA1 to IL-12. A group-specific survival analysis on IL-12 and LTA1+IL12 groups would provide a way to compare the humoral response between the two adjuvant groups. Unfortunately this study's sample size of 8 subjects per group is not sufficient to support this modeling approach. However, the four-way group classification result (Appendix Figure S7D) does show that none of the antibody Fc features specific to the LTA1+IL12 group appeared in the correlates of protection (Figure 2E&F).

Minor points:

The current description of experimental study [Ref.43] in Introduction is confusing due to numbering 1)-3). I suggest to remove 3) and talk about adjuvant in a separate sentence. Also, the Reader will benefit from overall more accurate description of the experiments here. For example, mentioning the route of prime vaccination and that the boost was with rhFLSC variant different from included in the prime vaccination.

Authors' response: We have changed the text (lines 99-109) to clarify these sources of confusion and generally make the protocol clearer.

suggestion for Table in Figure 1A to have just one unified description and not four same repeats in columns 3 and 4

Authors' response: We have made this clarifying change.

Fig.S5 description in the text "three of the six poorly protected animals that were predicted to have low risk of infection". suggestion to highlight those 6 animal points in different color to make it easy for Reader to follow.

Authors' response: We had mistakenly typed six instead of sixteen. We apologize for this error and thank the reviewer for catching it. We have now corrected the text (lines 263-266) and highlighted in the figure the three poorly predicted subjects with red circles. The sixteen subjects are shown in filled diamond shapes.

Fig.S5 A,C have "!" instead of "gamma"

Authors' response: On our machines the figure looks correct. We think this could be due to formatting incompatibility when importing .pdf figures into .doc files for the initial submission. Since the final figures will be in their original format, we hope the font problem will not persist.

2nd Editorial Decision

4<sup>th</sup> April 2019

Thank you again for sending us your revised manuscript. We are now satisfied with the modifications made and I am pleased to inform you that your paper has been accepted for publication.

**YOU MUST COMPLETE ALL CELLS WITH A PINK BACKGROUND ↓**

PLEASE NOTE THAT THIS CHECKLIST WILL BE PUBLISHED ALONGSIDE YOUR PAPER

Corresponding Author Name: Chris Bailey-Kellogg

Journal Submitted to: Molecular Systems Biology

Manuscript Number: MSB-18-8747

### Reporting Checklist For Life Sciences Articles (Rev. June 2017)

This checklist is used to ensure good reporting standards and to improve the reproducibility of published results. These guidelines are consistent with the Principles and Guidelines for Reporting Preclinical Research issued by the NIH in 2014. Please follow the journal's authorship guidelines in preparing your manuscript.

#### A- Figures

##### 1. Data

##### The data shown in figures should satisfy the following conditions:

- the data were obtained and processed according to the field's best practice and are presented to reflect the results of the experiments in an accurate and unbiased manner.
- figure panels include only data points, measurements or observations that can be compared to each other in a scientifically meaningful way.
- graphs include clearly labeled error bars for independent experiments and sample sizes. Unless justified, error bars should not be shown for technical replicates.
- if  $n < 5$ , the individual data points from each experiment should be plotted and any statistical test employed should be justified
- Source Data should be included to report the data underlying graphs. Please follow the guidelines set out in the author ship guidelines on Data Presentation.

##### 2. Captions

##### Each figure caption should contain the following information, for each panel where they are relevant:

- a specification of the experimental system investigated (eg cell line, species name).
- the assay(s) and method(s) used to carry out the reported observations and measurements
- an explicit mention of the biological and chemical entity(ies) that are being measured.
- an explicit mention of the biological and chemical entity(ies) that are altered/varied/perturbed in a controlled manner.
- the exact sample size (n) for each experimental group/condition, given as a number, not a range;
- a description of the sample collection allowing the reader to understand whether the samples represent technical or biological replicates (including how many animals, litters, cultures, etc.).
- a statement of how many times the experiment shown was independently replicated in the laboratory.
- definitions of statistical methods and measures:
  - common tests, such as t-test (please specify whether paired vs. unpaired), simple  $\chi^2$  tests, Wilcoxon and Mann-Whitney tests, can be unambiguously identified by name only, but more complex techniques should be described in the methods section;
  - are tests one-sided or two-sided?
  - are there adjustments for multiple comparisons?
  - exact statistical test results, e.g., P values = x but not P values < x;
  - definition of 'center values' as median or average;
  - definition of error bars as s.d. or s.e.m.

Any descriptions too long for the figure legend should be included in the methods section and/or with the source data.

**In the pink boxes below, please ensure that the answers to the following questions are reported in the manuscript itself. Every question should be answered. If the question is not relevant to your research, please write NA (non applicable). We encourage you to include a specific subsection in the methods section for statistics, reagents, animal models and human subjects.**

#### B- Statistics and general methods

Please fill out these boxes ↓ (Do not worry if you cannot see all your text once you press return)

|                                                                                                                                                                                         |                                                                    |
|-----------------------------------------------------------------------------------------------------------------------------------------------------------------------------------------|--------------------------------------------------------------------|
| 1.a. How was the sample size chosen to ensure adequate power to detect a pre-specified effect size?                                                                                     | n/a for this manuscript; the animal studies were already published |
| 1.b. For animal studies, include a statement about sample size estimate even if no statistical methods were used.                                                                       | n/a for this manuscript; the animal studies were already published |
| 2. Describe inclusion/exclusion criteria if samples or animals were excluded from the analysis. Were the criteria pre-established?                                                      | n/a for this manuscript; the animal studies were already published |
| 3. Were any steps taken to minimize the effects of subjective bias when allocating animals/samples to treatment (e.g. randomization procedure)? If yes, please describe.                | n/a for this manuscript; the animal studies were already published |
| For animal studies, include a statement about randomization even if no randomization was used.                                                                                          | n/a for this manuscript; the animal studies were already published |
| 4.a. Were any steps taken to minimize the effects of subjective bias during group allocation or/and when assessing results (e.g. blinding of the investigator)? If yes please describe. | n/a for this manuscript; the animal studies were already published |
| 4.b. For animal studies, include a statement about blinding even if no blinding was done                                                                                                | n/a for this manuscript; the animal studies were already published |
| 5. For every figure, are statistical tests justified as appropriate?                                                                                                                    | yes                                                                |
| Do the data meet the assumptions of the tests (e.g., normal distribution)? Describe any methods used to assess it.                                                                      | no such assumptions are made                                       |
| Is there an estimate of variation within each group of data?                                                                                                                            | n/a                                                                |
| Is the variance similar between the groups that are being statistically compared?                                                                                                       | n/a                                                                |

#### USEFUL LINKS FOR COMPLETING THIS FORM

<http://www.antibodypedia.com>  
<http://1degreebio.org>  
<http://www.equator-network.org/reporting-guidelines/improving-bioscience-research-repo>

<http://grants.nih.gov/grants/olaw/olaw.htm>  
<http://www.mrc.ac.uk/Ourresearch/Ethicsresearchguidance/Useofanimals/index.htm>  
<http://ClinicalTrials.gov>  
<http://www.consort-statement.org>  
<http://www.consort-statement.org/checklists/view/32-consort/66-title>

<http://www.equator-network.org/reporting-guidelines/reporting-recommendations-for-tun>  
<http://datadryad.org>

<http://figshare.com>

<http://www.ncbi.nlm.nih.gov/gap>

<http://www.ebi.ac.uk/ega>

<http://biomodels.net/>

<http://biomodels.net/miriam/>  
<http://jij.biochem.sun.ac.za>  
[http://oba.od.nih.gov/biosecurity/biosecurity\\_documents.html](http://oba.od.nih.gov/biosecurity/biosecurity_documents.html)  
<http://www.selectagents.gov/>



### C- Reagents

|                                                                                                                                                                                                                                                                                                                              |                                                                                                                                                                                                                                                               |
|------------------------------------------------------------------------------------------------------------------------------------------------------------------------------------------------------------------------------------------------------------------------------------------------------------------------------|---------------------------------------------------------------------------------------------------------------------------------------------------------------------------------------------------------------------------------------------------------------|
| 6. To show that antibodies were profiled for use in the system under study (assay and species), provide a citation, catalog number and/or clone number, supplementary information or reference to an antibody validation profile. e.g., Antibodypedia (see link list at top right), 1DegreeBio (see link list at top right). | Commercially sourced antibodies include: goat anti-rhesus IgG PE conjugate (Southern Biotech #6200-09 - <a href="https://www.southernbiotech.com/?catno=6200-09&amp;type=Polyclonal">https://www.southernbiotech.com/?catno=6200-09&amp;type=Polyclonal</a> ) |
| 7. Identify the source of cell lines and report if they were recently authenticated (e.g., by STR profiling) and tested for mycoplasma contamination.                                                                                                                                                                        | n/a for this manuscript; the cell-based assay data analyzed was already published                                                                                                                                                                             |

\* for all hyperlinks, please see the table at the top right of the document

### D- Animal Models

|                                                                                                                                                                                                                                                                                                                                                                                    |                                                                    |
|------------------------------------------------------------------------------------------------------------------------------------------------------------------------------------------------------------------------------------------------------------------------------------------------------------------------------------------------------------------------------------|--------------------------------------------------------------------|
| 8. Report species, strain, gender, age of animals and genetic modification status where applicable. Please detail housing and husbandry conditions and the source of animals.                                                                                                                                                                                                      | n/a for this manuscript; the animal studies were already published |
| 9. For experiments involving live vertebrates, include a statement of compliance with ethical regulations and identify the committee(s) approving the experiments.                                                                                                                                                                                                                 | n/a for this manuscript; the animal studies were already published |
| 10. We recommend consulting the ARRIVE guidelines (see link list at top right) (PLoS Biol. 8(6), e1000412, 2010) to ensure that other relevant aspects of animal studies are adequately reported. See author guidelines, under 'Reporting Guidelines'. See also: NIH (see link list at top right) and MRC (see link list at top right) recommendations. Please confirm compliance. | n/a for this manuscript; the animal studies were already published |

### E- Human Subjects

|                                                                                                                                                                                                                                                                                                                    |     |
|--------------------------------------------------------------------------------------------------------------------------------------------------------------------------------------------------------------------------------------------------------------------------------------------------------------------|-----|
| 11. Identify the committee(s) approving the study protocol.                                                                                                                                                                                                                                                        | n/a |
| 12. Include a statement confirming that informed consent was obtained from all subjects and that the experiments conformed to the principles set out in the WMA Declaration of Helsinki and the Department of Health and Human Services Belmont Report.                                                            | n/a |
| 13. For publication of patient photos, include a statement confirming that consent to publish was obtained.                                                                                                                                                                                                        | n/a |
| 14. Report any restrictions on the availability (and/or on the use) of human data or samples.                                                                                                                                                                                                                      | n/a |
| 15. Report the clinical trial registration number (at ClinicalTrials.gov or equivalent), where applicable.                                                                                                                                                                                                         | n/a |
| 16. For phase II and III randomized controlled trials, please refer to the CONSORT flow diagram (see link list at top right) and submit the CONSORT checklist (see link list at top right) with your submission. See author guidelines, under 'Reporting Guidelines'. Please confirm you have submitted this list. | n/a |
| 17. For tumor marker prognostic studies, we recommend that you follow the REMARK reporting guidelines (see link list at top right). See author guidelines, under 'Reporting Guidelines'. Please confirm you have followed these guidelines.                                                                        | n/a |

### F- Data Accessibility

|                                                                                                                                                                                                                                                                                                                                                                                                                                                                                                                                                                                                                                                                                                  |                                     |
|--------------------------------------------------------------------------------------------------------------------------------------------------------------------------------------------------------------------------------------------------------------------------------------------------------------------------------------------------------------------------------------------------------------------------------------------------------------------------------------------------------------------------------------------------------------------------------------------------------------------------------------------------------------------------------------------------|-------------------------------------|
| 18: Provide a "Data Availability" section at the end of the Materials & Methods, listing the accession codes for data generated in this study and deposited in a public database (e.g. RNA-Seq data: Gene Expression Omnibus GSE39462, Proteomics data: PRIDE PXD000208 etc.) Please refer to our author guidelines for 'Data Deposition'.<br><br>Data deposition in a public repository is mandatory for:<br>a. Protein, DNA and RNA sequences<br>b. Macromolecular structures<br>c. Crystallographic data for small molecules<br>d. Functional genomics data<br>e. Proteomics and molecular interactions                                                                                       | included                            |
| 19. Deposition is strongly recommended for any datasets that are central and integral to the study; please consider the journal's data policy. If no structured public repository exists for a given data type, we encourage the provision of datasets in the manuscript as a Supplementary Document (see author guidelines under 'Expanded View' or in unstructured repositories such as Dryad (see link list at top right) or Figshare (see link list at top right).                                                                                                                                                                                                                           | included in git repository          |
| 20. Access to human clinical and genomic datasets should be provided with as few restrictions as possible while respecting ethical obligations to the patients and relevant medical and legal issues. If practically possible and compatible with the individual consent agreement used in the study, such data should be deposited in one of the major public access-controlled repositories such as dbGAP (see link list at top right) or EGA (see link list at top right).                                                                                                                                                                                                                    | n/a                                 |
| 21. Computational models that are central and integral to a study should be shared without restrictions and provided in a machine-readable form. The relevant accession numbers or links should be provided. When possible, standardized format (SBML, CellML) should be used instead of scripts (e.g. MATLAB). Authors are strongly encouraged to follow the MIRIAM guidelines (see link list at top right) and deposit their model in a public database such as Biomodels (see link list at top right) or JWS Online (see link list at top right). If computer source code is provided with the paper, it should be deposited in a public repository or included in supplementary information. | all code included in git repository |

### G- Dual use research of concern

|                                                                                                                                                                                                                                                                                               |     |
|-----------------------------------------------------------------------------------------------------------------------------------------------------------------------------------------------------------------------------------------------------------------------------------------------|-----|
| 22. Could your study fall under dual use research restrictions? Please check biosecurity documents (see link list at top right) and list of select agents and toxins (APHIS/CDC) (see link list at top right). According to our biosecurity guidelines, provide a statement only if it could. | n/a |
|-----------------------------------------------------------------------------------------------------------------------------------------------------------------------------------------------------------------------------------------------------------------------------------------------|-----|
